# Supplementary material
Source: publisher site journal article supplement (https://www.dovepress.com/article/601076)
Supplement: Supplementary file 1 [file 601076%20Revised%20%2509Supplementary%20material.docx]

**Supplementary Table 1 Primer sequences in qRT-PCR**

| **Gene** | **Sequence（5'-3'）** |
| --- | --- |
| FKBP5-F | GAATGCTGTGACAAGGCCC |
| FKBP5-R | GTCACCCTTGGCTGACTCAA |
| HLA-DQA1-F | TGAAACACTGGGAGCCTGAG |
| HLA-DQA1-R | CATGAGGCCCACAGACAACC |
| GAPDH-F | AGGCCGGATGTGTTCGC |
| GAPDH-R | CAAATCCGTTGACTCCGACC |

**
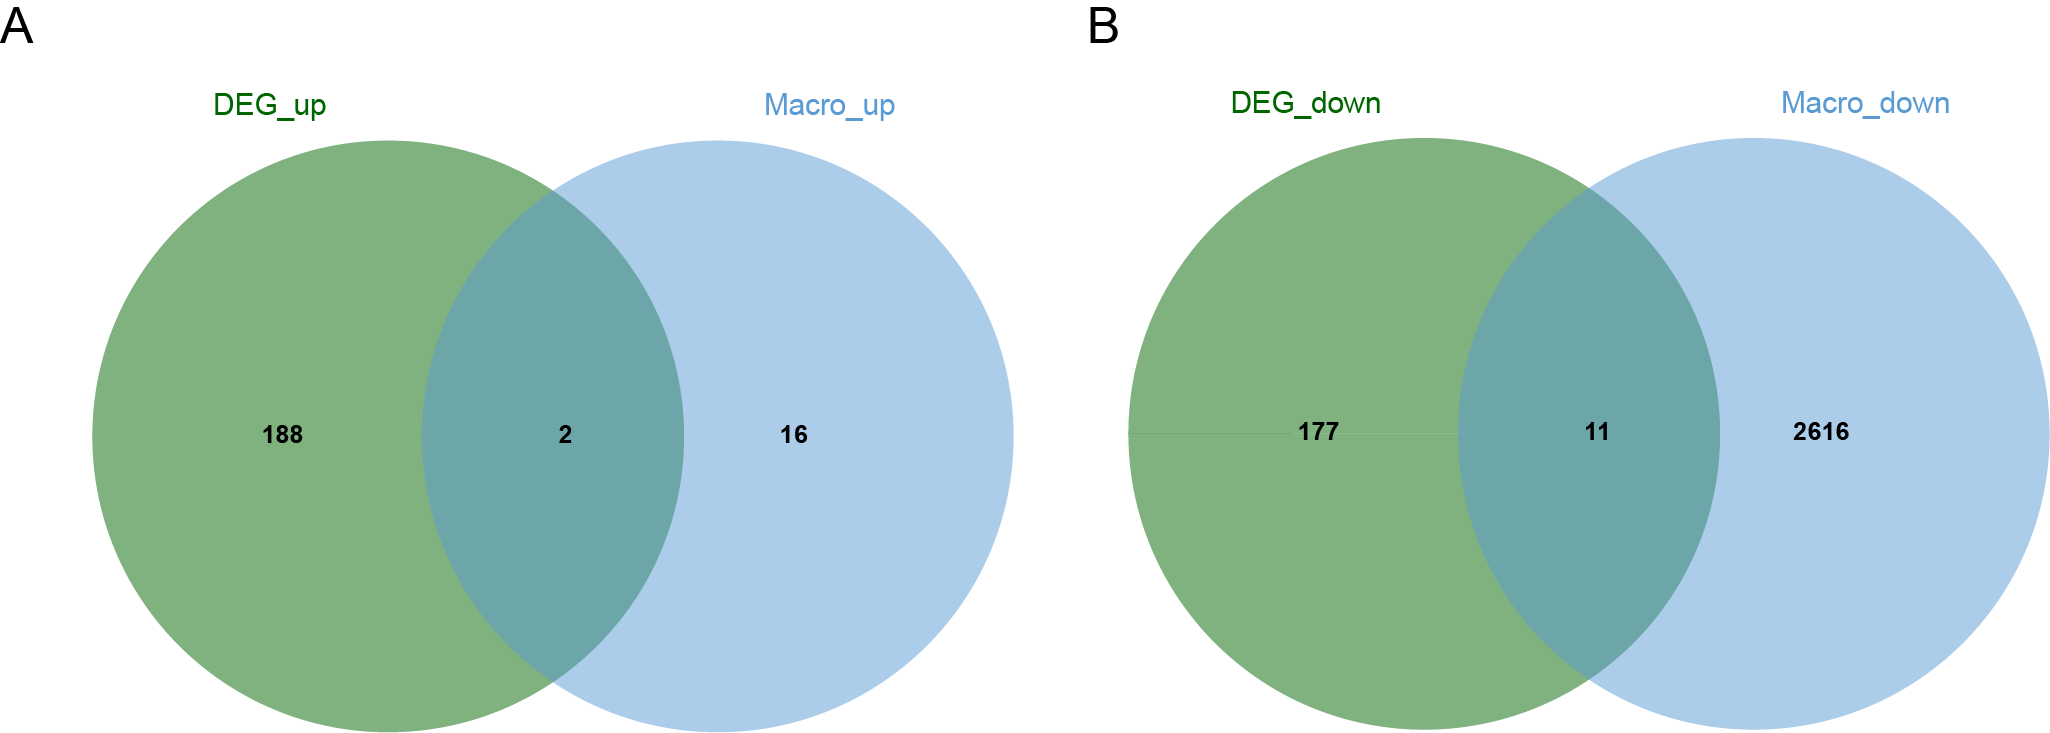
**

**Supplementary Figure 1. Venn diagram**


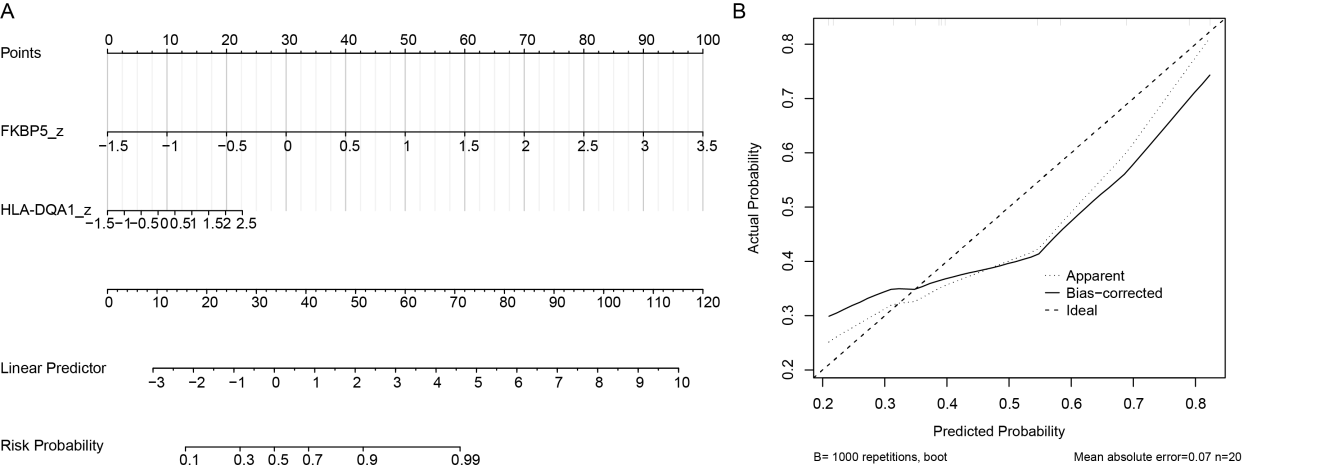


**Supplementary Figure 2. Nomogram and evaluation results**

1. Nomogram construction; (B) Calibration curve evaluating nomogram accuracy.


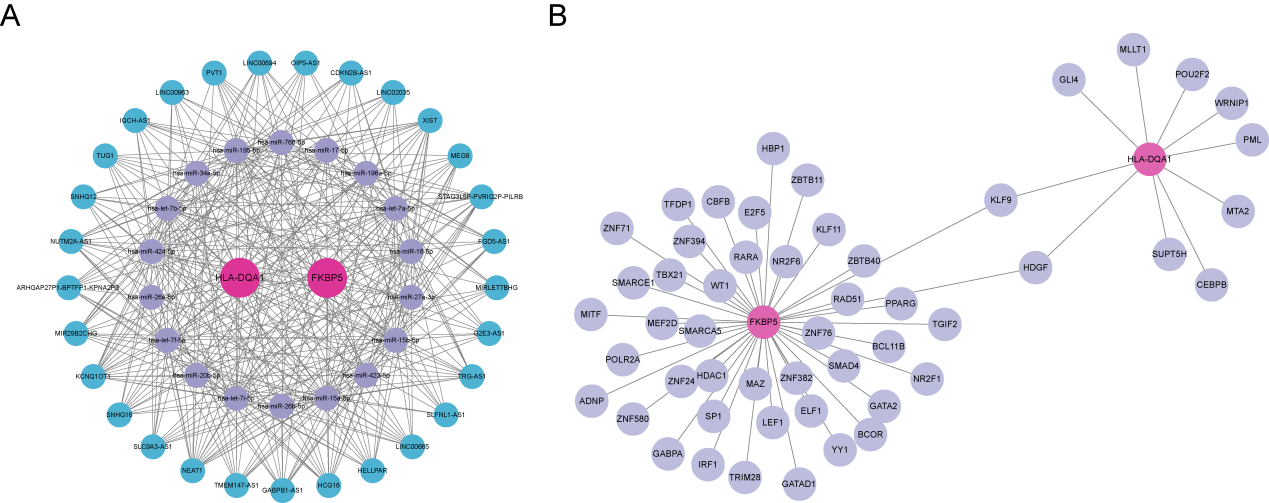


**Supplementary Figure 3. Key gene network regulatory mechanisms**

(A) ceRNA network construction. Blue nodes represent lncRNAs, purple nodes represent miRNAs, red nodes represent mRNAs. (B) Transcription factor prediction. Purple nodes represent transcription factors, red nodes represent key genes.

**Supplementary Table 2. Binding free energies between key genes and small molecule drugs.**

| Drugs | targets | binding energy（kcal/mol） |
| --- | --- | --- |
| saccharin | FKBP5 | -5.208 |
| dacinostat | FKBP5 | -5.896 |
| medrysone | FKBP5 | -7.164 |
| salicin | FKBP5 | -5.788 |
| senicapoc | FKBP5 | -6.877 |
| budesonide | FKBP5 | -6.495 |
| caffeine | FKBP5 | -4.804 |
| timolol | FKBP5 | -5.217 |
| zolpidem | FKBP5 | -6.329 |
| betamethasone | FKBP5 | -7.213 |
| saccharin | HLA-DQA1 | -5.545 |
| dacinostat | HLA-DQA1 | -6.23 |
| medrysone | HLA-DQA1 | -8.154 |
| salicin | HLA-DQA1 | -5.468 |
| senicapoc | HLA-DQA1 | -7.632 |
| budesonide | HLA-DQA1 | -8.137 |
| caffeine | HLA-DQA1 | -4.695 |
| timolol | HLA-DQA1 | -5.152 |
| zolpidem | HLA-DQA1 | -7.042 |
| betamethasone | HLA-DQA1 | -7.773 |


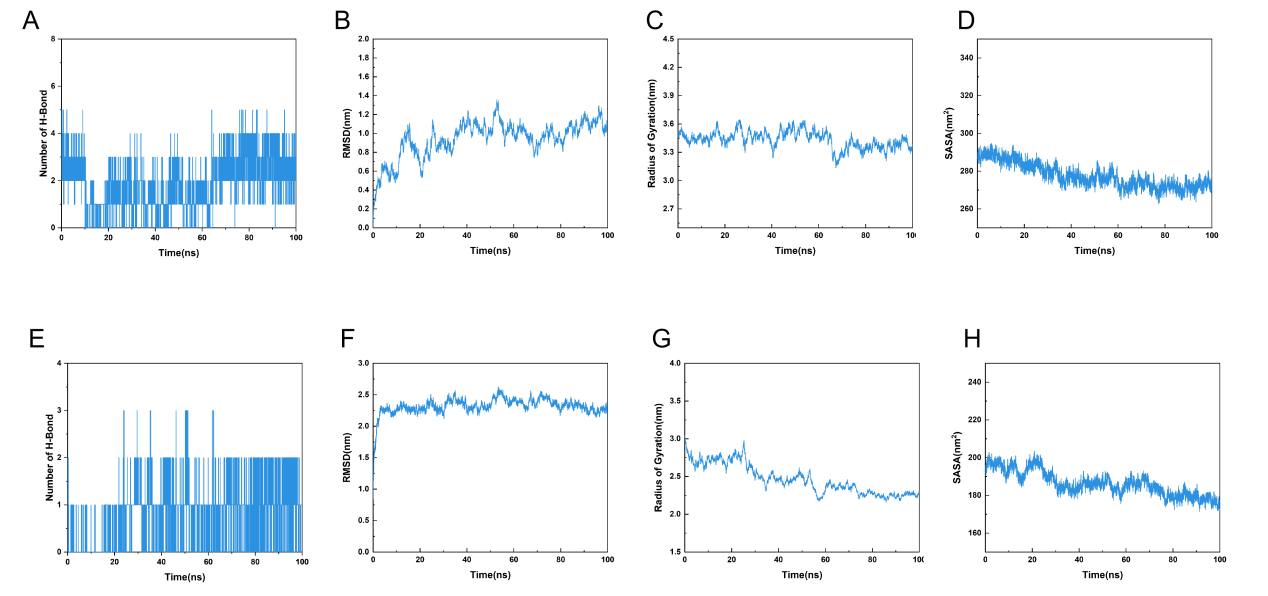


**Supplementary Figure 4. System stability assessment during 100 ns molecular dynamics simulations.**

(A-D) Betamethasone-FKBP5 complex: (A) Number of hydrogen bonds, (B) backbone RMSD, (C) radius of gyration (Rg), and (D) solvent-accessible surface area (SASA). (E-H) Medrysone-HLA-DQA1 complex: (E) Number of hydrogen bonds, (F) backbone RMSD, (G) radius of gyration (Rg), and (H) solvent-accessible surface area (SASA).
